# Supplementary material for: Sensitive quantitative analysis of the bitter glycoside amarogentin by specific monoclonal antibody-based indirect competitive enzyme-linked immunosorbent assay
Source: PubMed Central journal article supplement (PMC9080458; doi:10.1039/c8ra02922a), 2018-05-14
Supplement: RA-008-C8RA02922A-s001.pdf [file RA-008-C8RA02922A-s001.pdf]

**Sensitive quantitative analysis of the bitter glycoside, amarogentin by  
specific monoclonal antibody-based indirect competitive enzyme-linked  
immunosorbent assay**

**Seiichi Sakamoto,<sup>a,\*</sup> Shinji Wada,<sup>a</sup> Hiroyuki Tanaka,<sup>a,\*</sup> Satoshi Morimoto <sup>a</sup>**

<sup>a</sup> *Graduate School of Pharmaceutical Sciences, Kyushu University, 3-1-1 Maidashi,  
Higashi-ku, Fukuoka 812-8582, Japan*

Running title: Sensitive detection of amarogentin by icELISA

\*Corresponding author:

Seiichi Sakamoto and Hiroyuki Tanaka

Department of Pharmacognosy, Graduate School of Pharmaceutical Sciences,

Kyushu University; 3-1-1 Maidashi, Higashi-ku, Fukuoka 812-8582, Japan

E-mail: [s.sakamoto@phar.kyushu-u.ac.jp](mailto:s.sakamoto@phar.kyushu-u.ac.jp) (Sakamoto S) [htanaka@phar.kyushu-u.ac.jp](mailto:htanaka@phar.kyushu-u.ac.jp) (Tanaka H)

Tel. & Fax: +81 92 642 6581

## Supplementary information

*Determination of hapten number of AG-BSA conjugates by matrix-assisted laser desorption/ionization time-of-flight mass spectrometry (MALDI-TOF-MS)*

The hapten numbers of the AG-BSA conjugates were evaluated by MALDI-TOF-MS in accordance with our previous method.<sup>1</sup> Primarily, AG-BSA conjugates were serially diluted with distilled water at a final concentration of 20, 10, 5, and 2.5 mg mL<sup>-1</sup>. They were then mixed with matrix solution of sinapinic acid saturated in a mixture solution of 0.15% (v/v) trifluoroacetic acid and acetonitrile in a ratio of 2 to 1. The resulting mixtures (2 µL) were applied onto an MTP 384 ground steel target plate after centrifugation (Bruker Daltonics, Bremen, Germany) and the samples were subjected to MALDI-TOF-MS (BRUKER Autoflex III, Bruker Daltonics, Bremen, Germany). Nitrogen laser (337 nm, 200 Hz maximum firing rate) was used for irradiation and the spectrum was directly recorded in linear positive high-mass mode with a mass range of 10,000 to 200,000 Da. The data were then analyzed using flexControl software (Bruker Daltonics, Bremen, Germany).

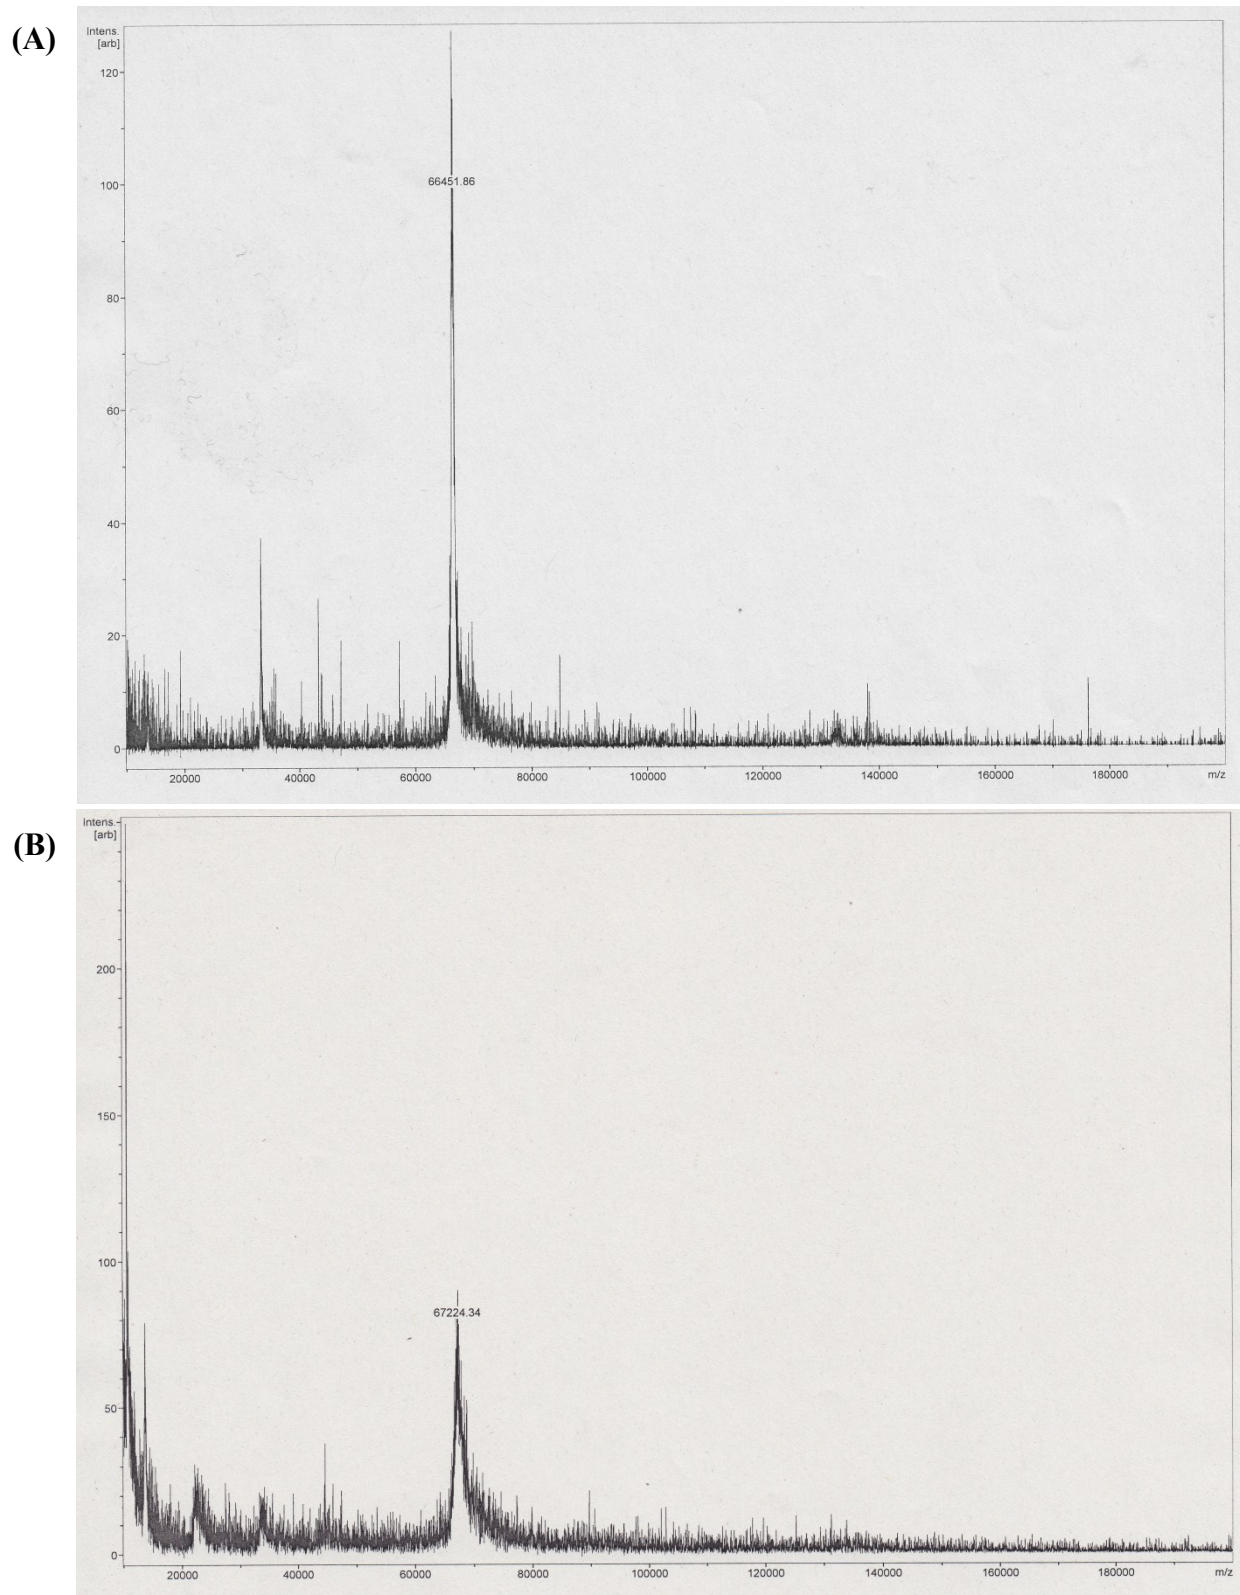

Figure S1 MALDI-TOF-MS spectrum of BSA (A) and AG-BSA conjugates (B) for determination of hapten numbers.

### Screening of test compounds for further CRs test

To investigate CRs of MAb 1E9, screening was conducted by icELISA using 41 kinds of natural products. The samples were prepared in 5% (v/v) MeOH at the final concentration of 50  $\mu\text{g mL}^{-1}$  and the compounds showing the inhibition rate above 50% were further analyzed in the CRs test.

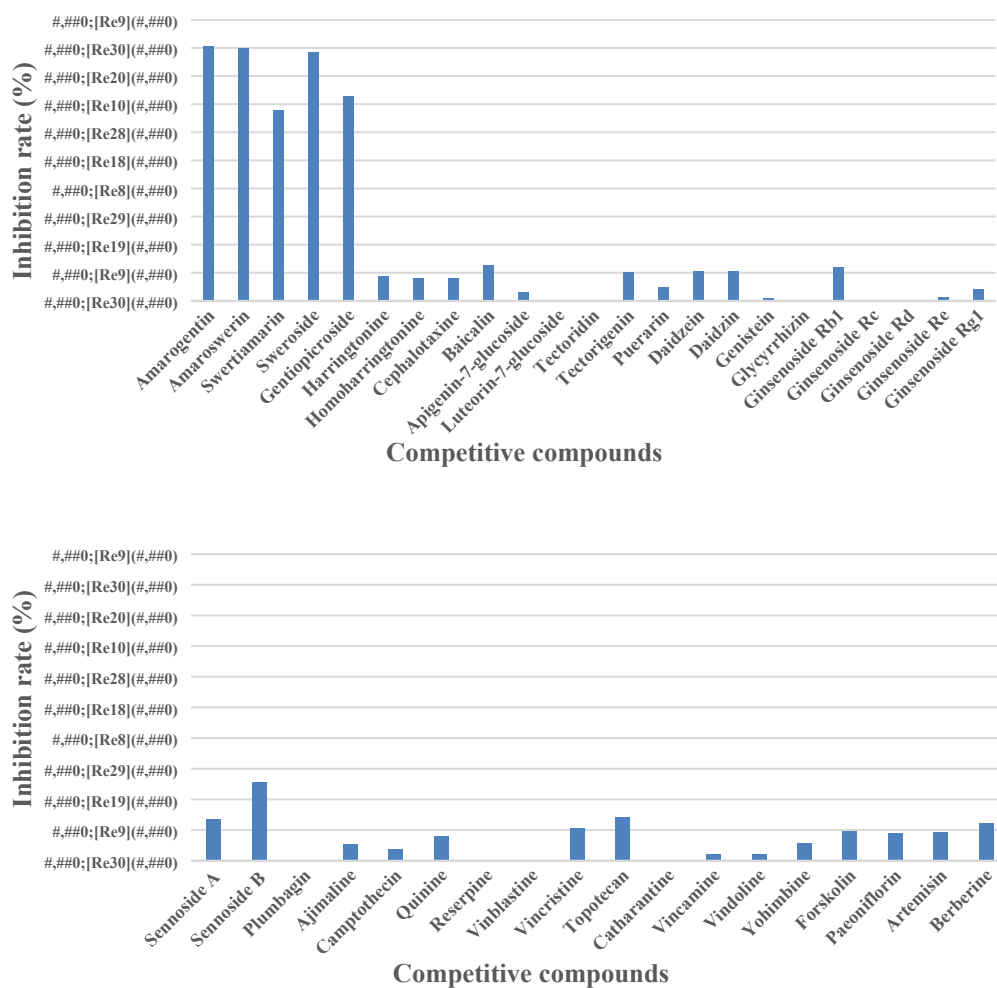

Fig. S2 Screening of test compounds for CRs test.

1. L.J. Xuan, H. Tanaka, S. Morimoto, Y. Shoyama, H. Akanuma and K. Muraoka, *Spectroscopy*, 2000, **14**, 85–92.
